# Supplementary material for: Microplate-based 3D-printed image box for urea determination in milk by digital image colorimetry
Source: Royal Society of Chemistry journal article supplement (doi:10.1039/d4ay01191k), 2024-01-01
Supplement: d4ay01191k1.pdf [file d4ay01191k1.pdf]

## Microplate-based 3D-Printed Image Box for Urea Determination in Milk by Digital Image Colorimetry

Geovanna Morgado da Penha<sup>a</sup>, Airton Vicente Pereira<sup>b</sup>, Emily Amábile Tavares<sup>a</sup>, Daniel Júnior Almeida dos Santos<sup>a</sup>, Orlando Fatibello-Filho<sup>\*a</sup>

\*Corresponding author: [airtonvp@uepg.br](mailto:airtonvp@uepg.br)

<sup>a</sup>Department of Chemistry, Federal University of São Carlos, São Carlos 13565-905, SP, Brazil

<sup>b</sup>Department of Pharmaceutical Sciences, State University of Ponta Grossa, Ponta Grossa 84030-900, PR, Brazil

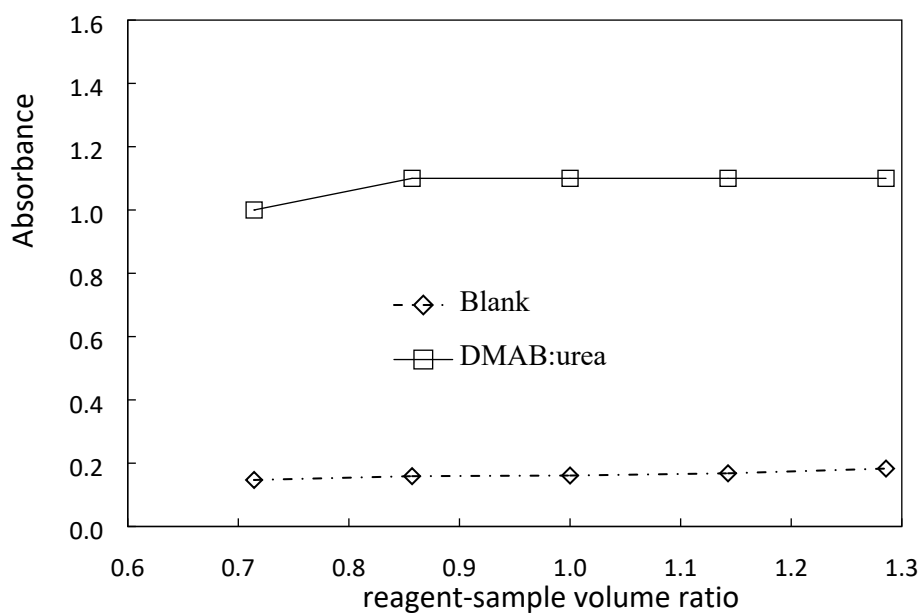

Figure S1. Effect of reagent:sample volume ratio in the analytical signal

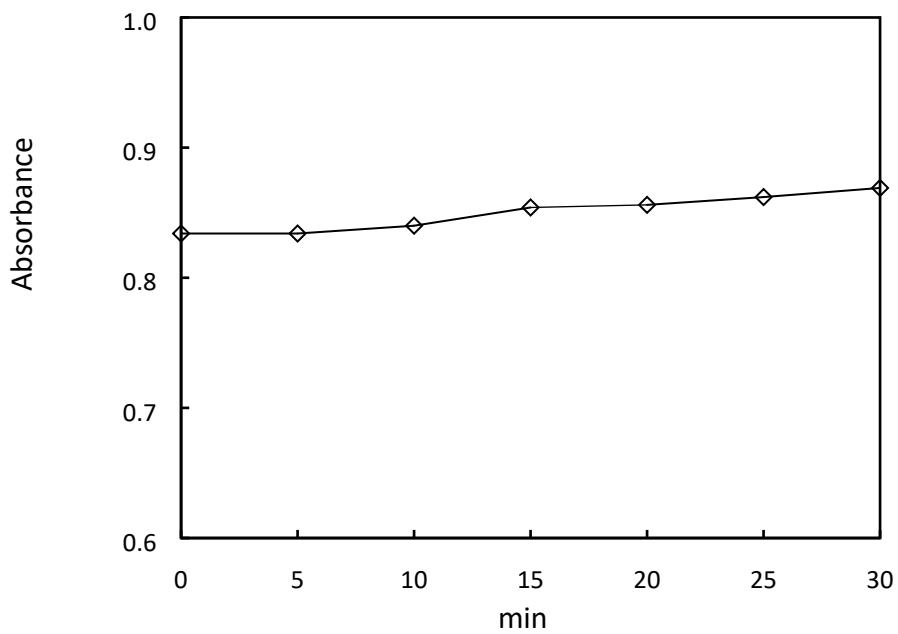

Figure S2. Effect of reaction time on the formation of condensation product (DMAB:urea).

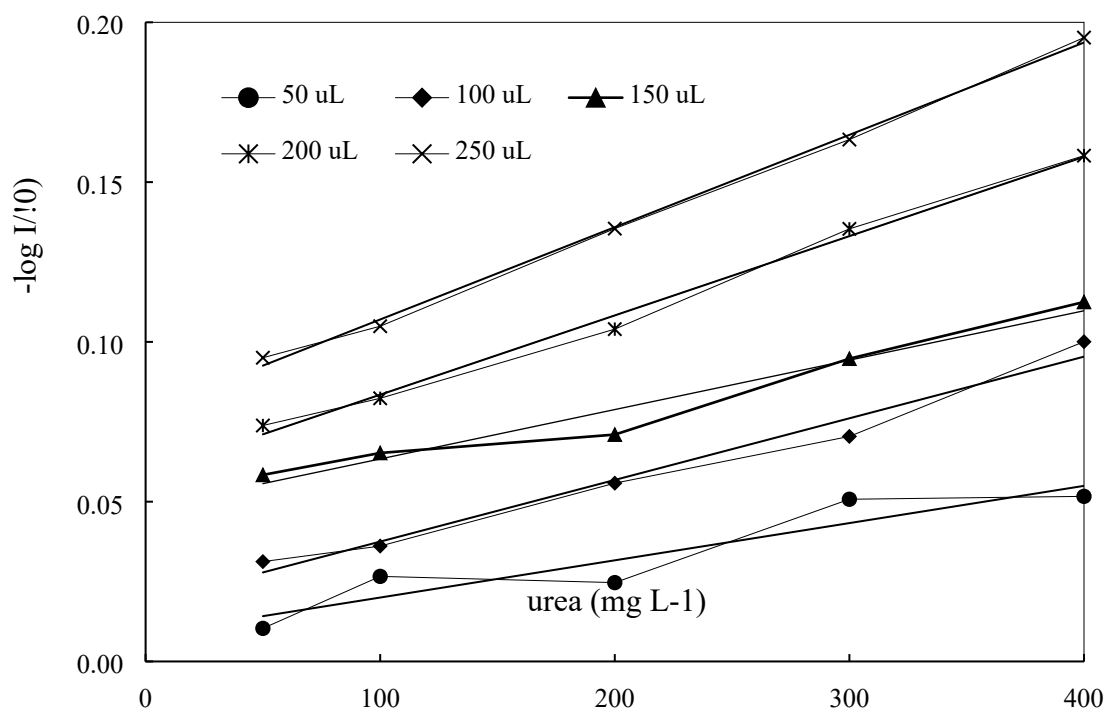

Figure S3. Influence of the final volume per well
